# Supplementary material for: 5,10,15,20-tetra(4-pyridyl)porphyrinato zinc coordination polymeric particles with different shapes and luminescent properties
Source: Royal Society of Chemistry journal article supplement (doi:10.1039/c2ce25187f), 2012-01-01
Supplement: c2ce25187f.pdf [file c2ce25187f.pdf]

## **Electronic Supplementary Information (ESI)**

# **5,10,15,20-tetra(4-pyridyl)porphyrinato zinc coordination polymeric particles with different shape and luminescent property**

Wei Sun, Hailong Wang, Dongdong Qi, Liang Wang, Kang Wang, Jinlan Kan, Wenjun Li,\* Yanli  
Chen,\* and Jianzhuang Jiang

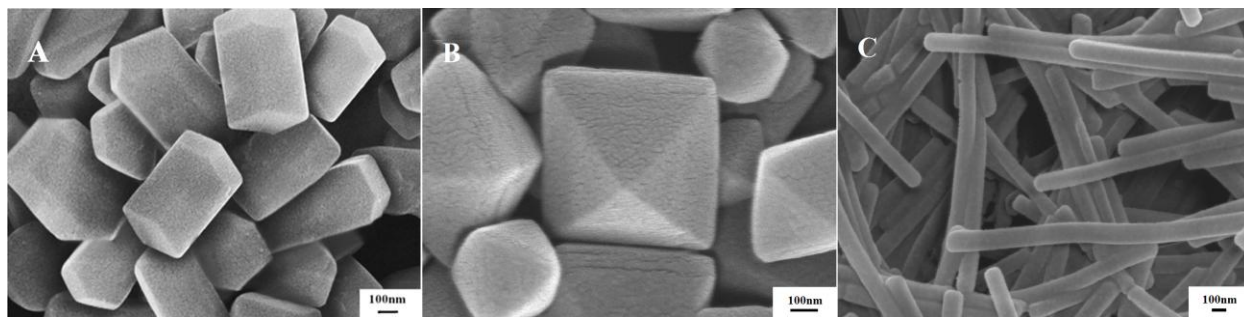

**Fig. S1** Higher magnification SEM images of micro-prisms (A), micro-octahedrons (B) and micro-rods (C).

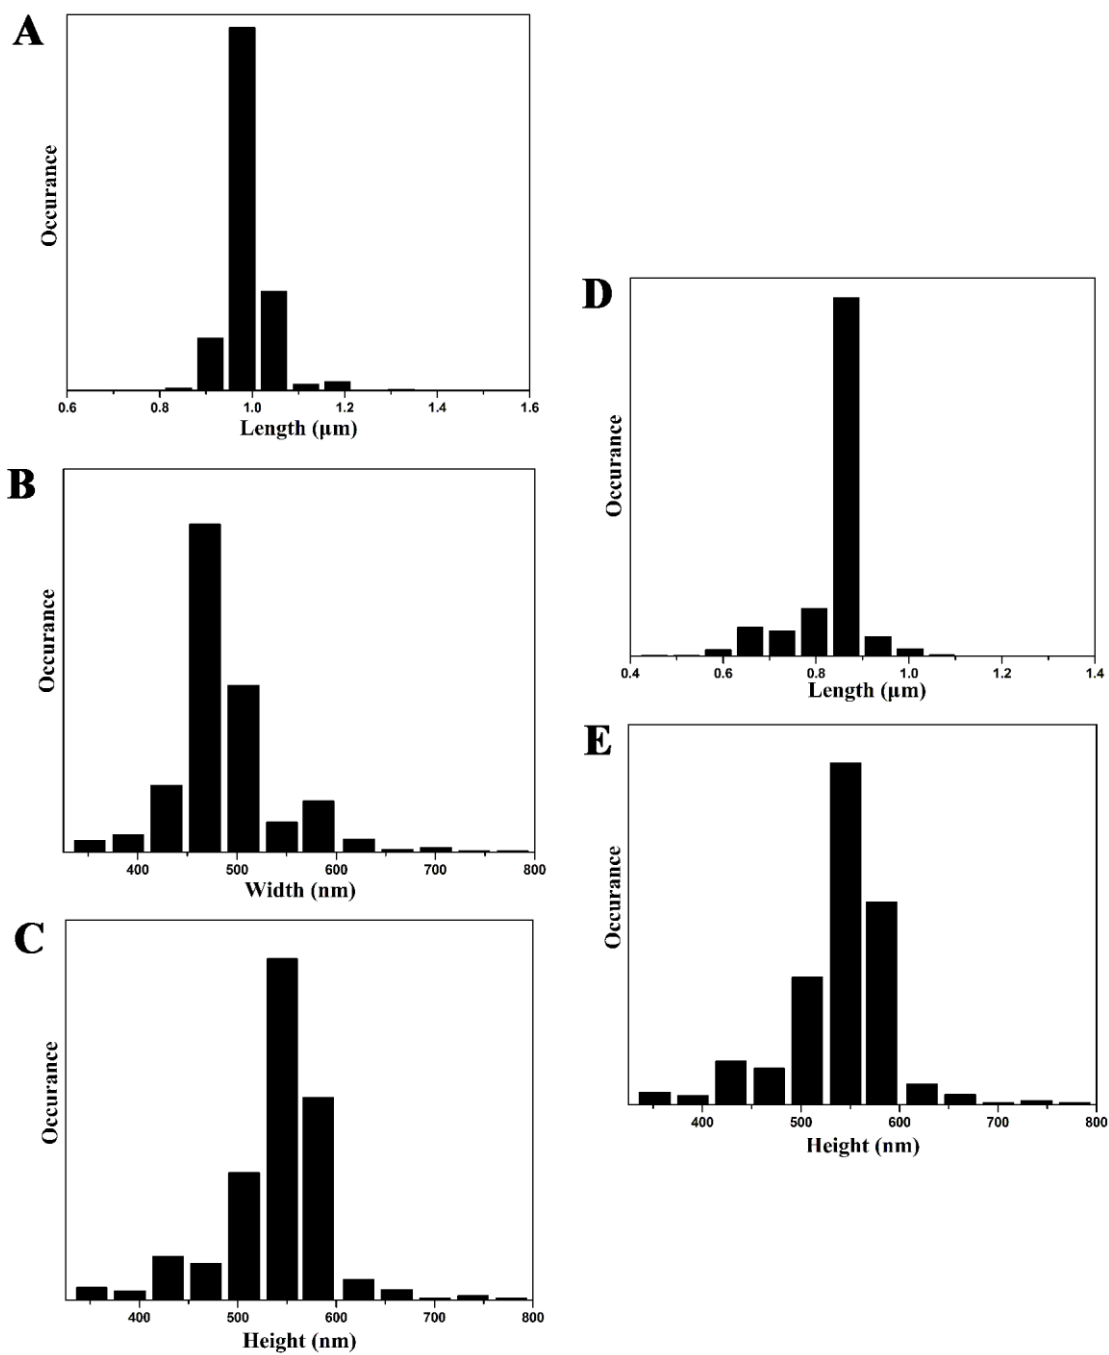

**Fig. S2** The length distribution of micro-prisms (A) and micro-octahedrons (D), the width distribution of the micro-prisms (B), the height of micro-prisms (C) and micro-octahedrons (E).

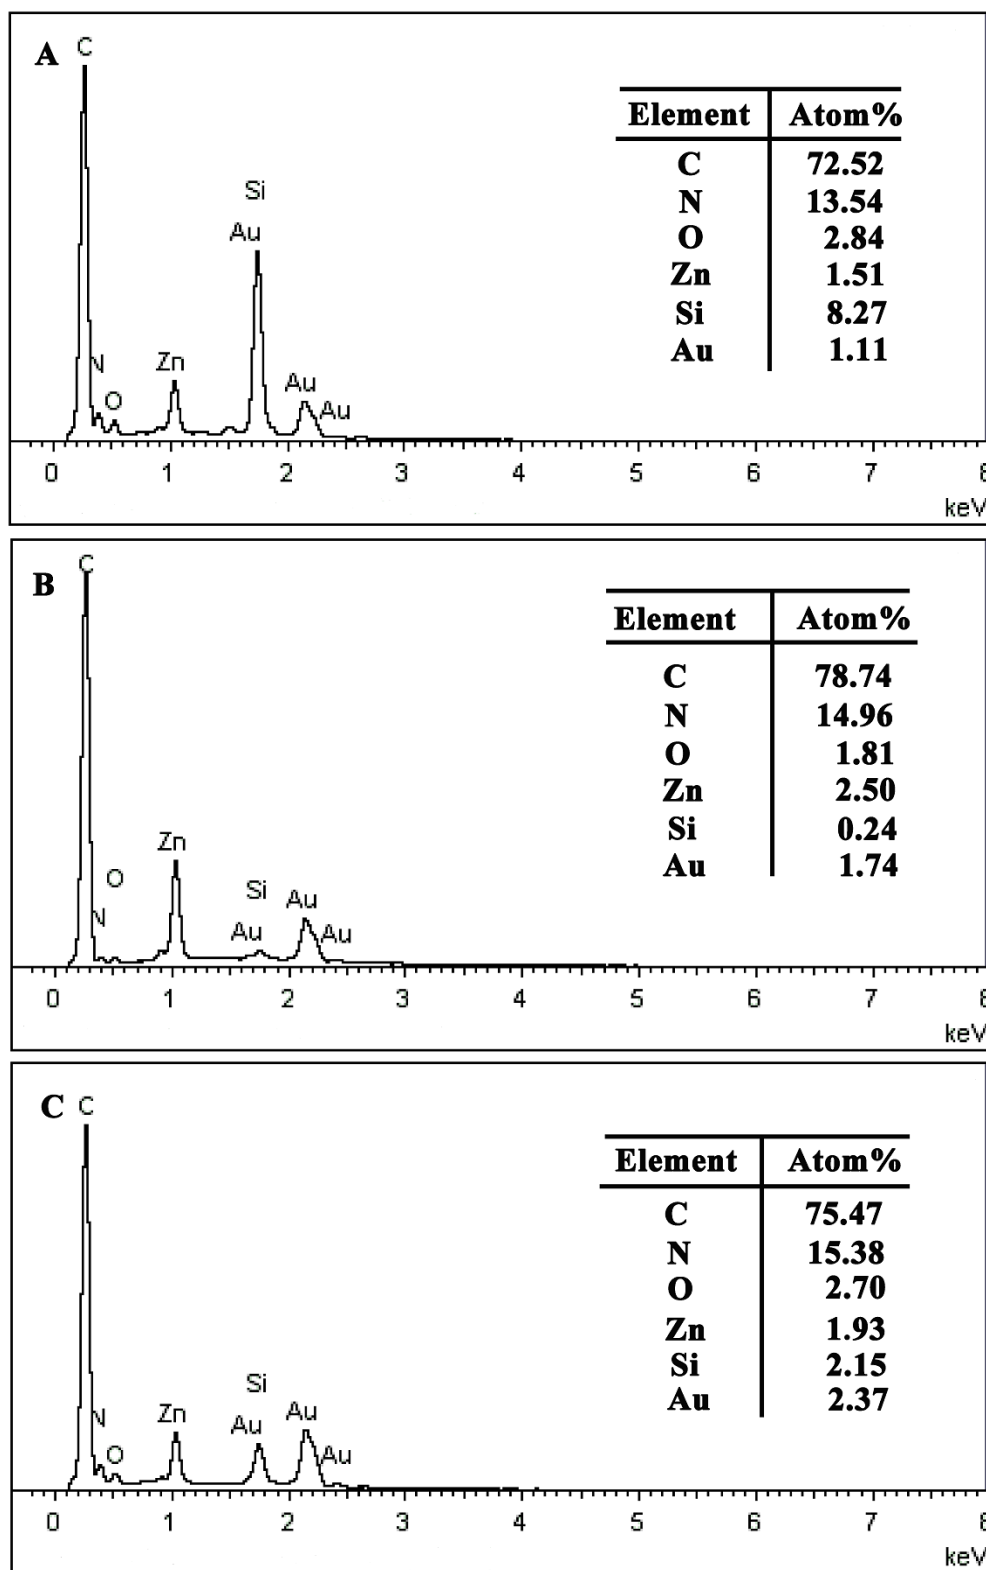

**Fig. S3** The energy dispersed X-ray (EDX) images of micro-prisms (A), micro-octahedrons (B), and self-assembled ZnTPyP micro-rods (C).
